# Supplementary material for: Immediate perception of a reward is distinct from the reward’s long-term salience
Source: eLife journal article supplement (doi:10.7554/elife.22283), 2016-12-21
Supplement: supp [file elife_poa_e22283_Figure_1_figure_supplement_1.pdf › elife_poa_e22283_Figure_1_figure_supplement_1.pdf]

A.

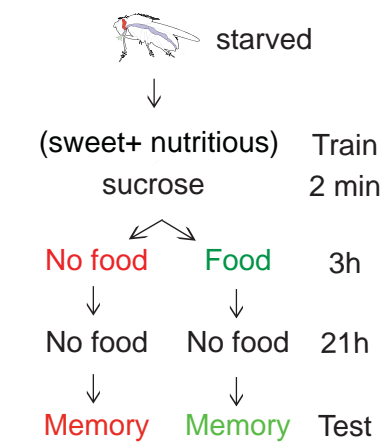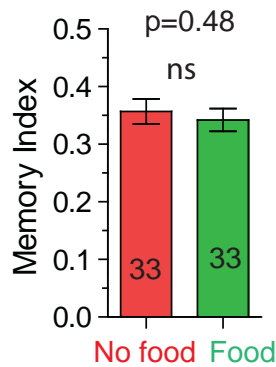

B.

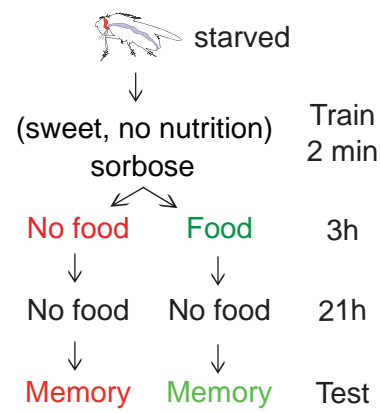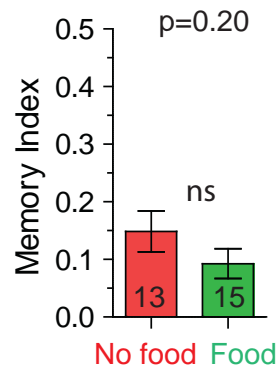

C

|             | L-fucose                 | D-arabinose              | L-arabinose              | L-sorbose               |                   |
|-------------|--------------------------|--------------------------|--------------------------|-------------------------|-------------------|
| L-fucose    |                          | 0.2 ± 0.04               | 0.05 ± 0.02              | 0.04 ± 0.02             | Preference        |
| D-arabinose | 0.78 ± 0.04              |                          | 0.08 ± 0.01              | 0.009 ± 0.003           |                   |
| L-arabinose | 0.91 ± 0.02              | 0.84 ± 0.02              |                          | 0.06 ± 0.05             |                   |
| L-sorbose   | 0.83 ± 0.06              | 0.91 ± 0.03              | 0.77 ± 0.08              |                         |                   |
|             | 0.17 ± 0.03              | 0.25 ± 0.04              | 0.21 ± 0.03              | 0.29 ± 0.03             | Short-term memory |
|             | 0.23 ± 0.03 <sup>a</sup> | 0.14 ± 0.04 <sup>b</sup> | 0.31 ± 0.03 <sup>a</sup> | 0.1 ± 0.02 <sup>b</sup> | Long-term memory  |

Figure1- Figure supplement1
