# Supplementary material for: Immediate perception of a reward is distinct from the reward’s long-term salience
Source: eLife journal article supplement (doi:10.7554/elife.22283), 2016-12-21
Supplement: supp [file elife_poa_e22283_Figure_3_figure_Supplement_2.pdf › elife_poa_e22283_Figure_3_figure_Supplement_2.pdf]

A

Mutation in Gr receptors: L-ara detection

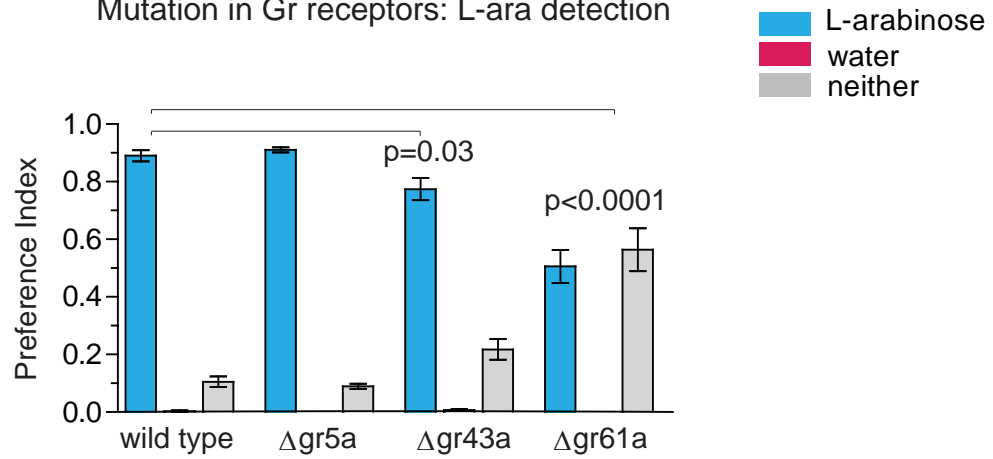

B

Mutation in Gr receptors: D-ara detection

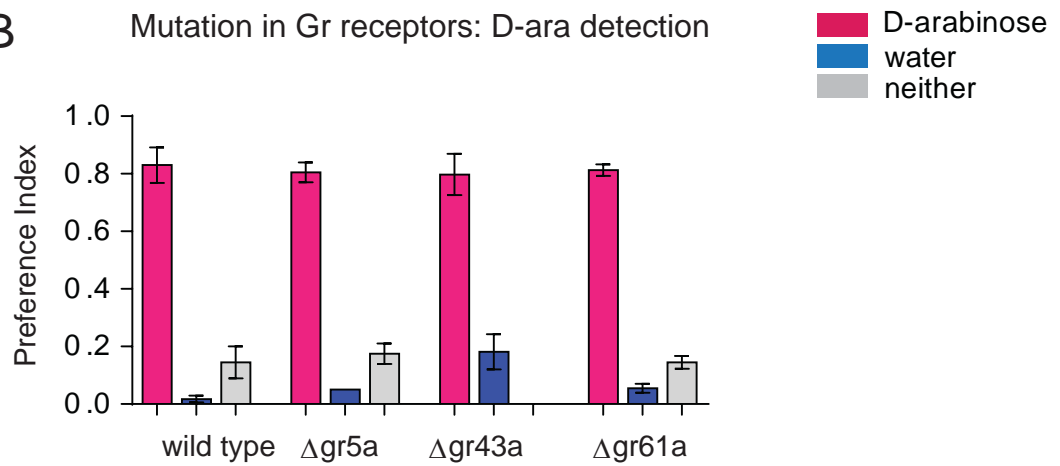

Figure 3-Figure supplement 2
