# Supplementary figures and images for: Immediate perception of a reward is distinct from the reward’s long-term salience
Source: eLife journal article supplement (doi:10.7554/elife.22283), 2016-12-21

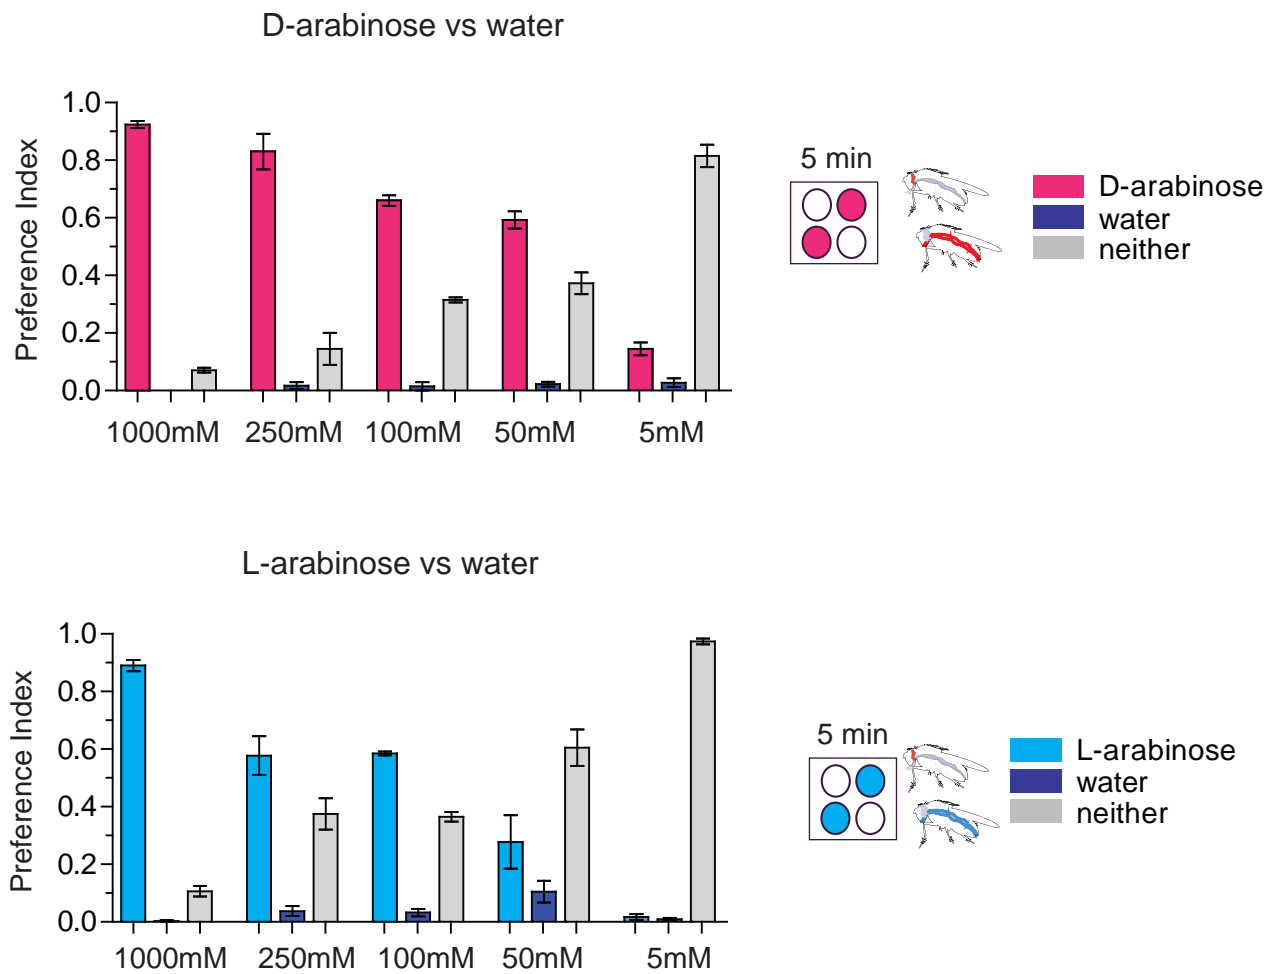

Figure 2- Figure supplement 1

Supplement: supp [file elife_poa_e22283_Figure_2_figure_Supplement_1.pdf › elife_poa_e22283_Figure_2_figure_Supplement_1.pdf]

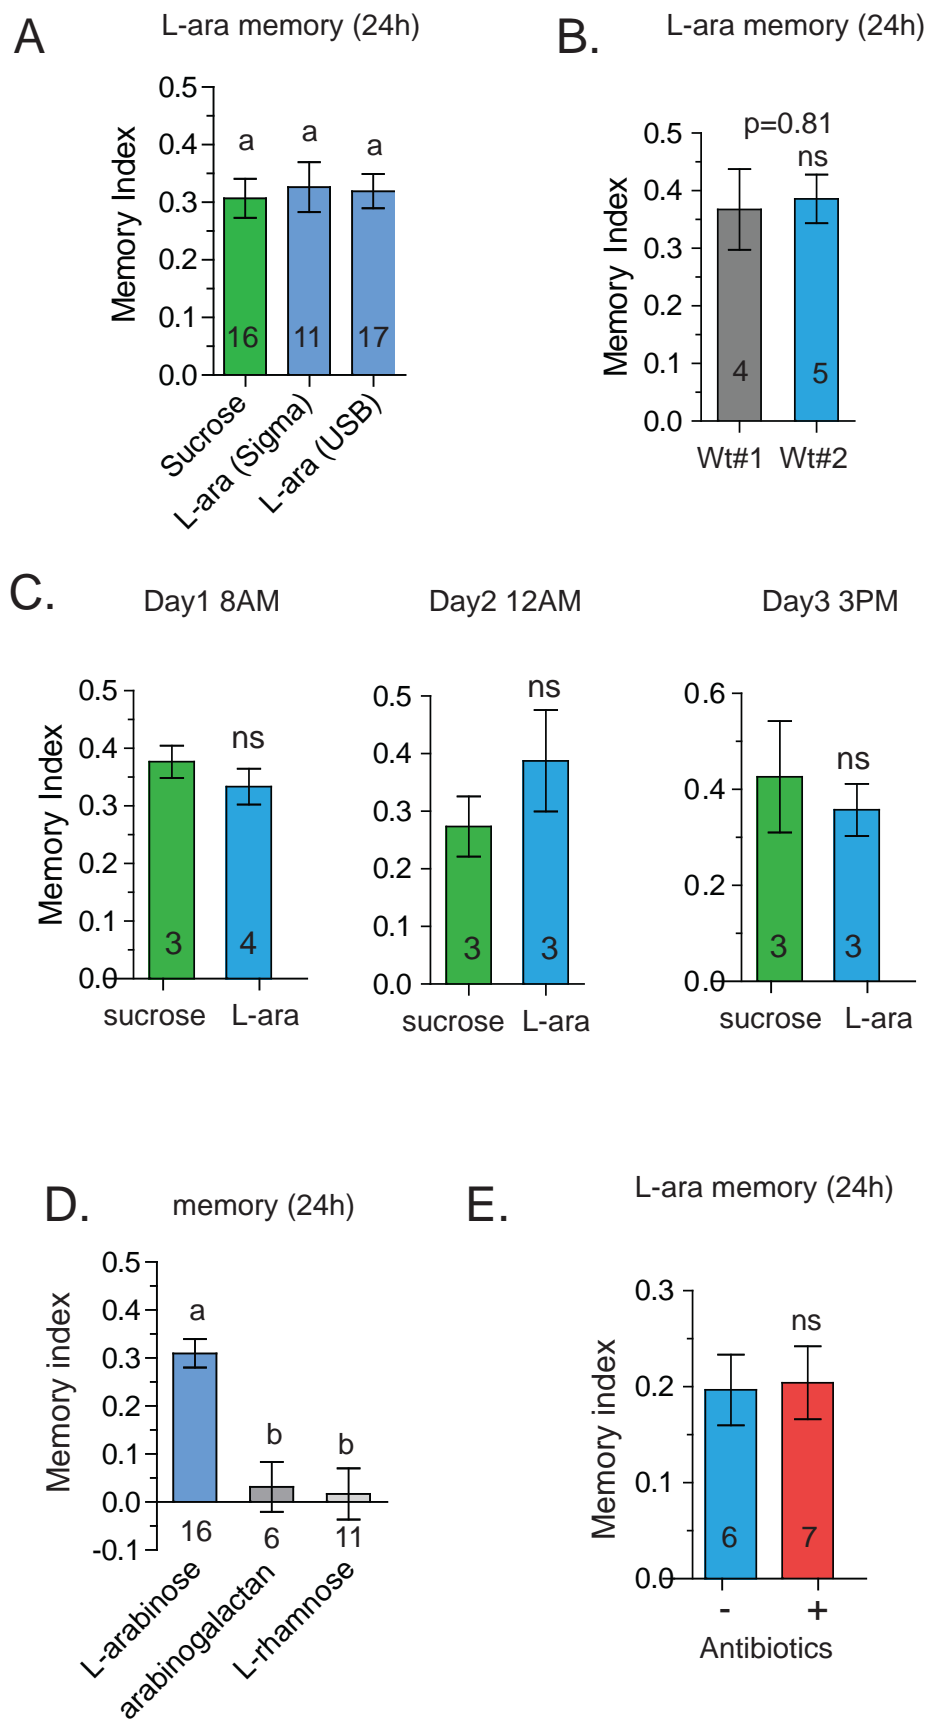

Figure 2- Figure supplement 2

Supplement: supp [file elife_poa_e22283_Figure_2_figure_Supplement_2.pdf › elife_poa_e22283_Figure_2_figure_Supplement_2.pdf]

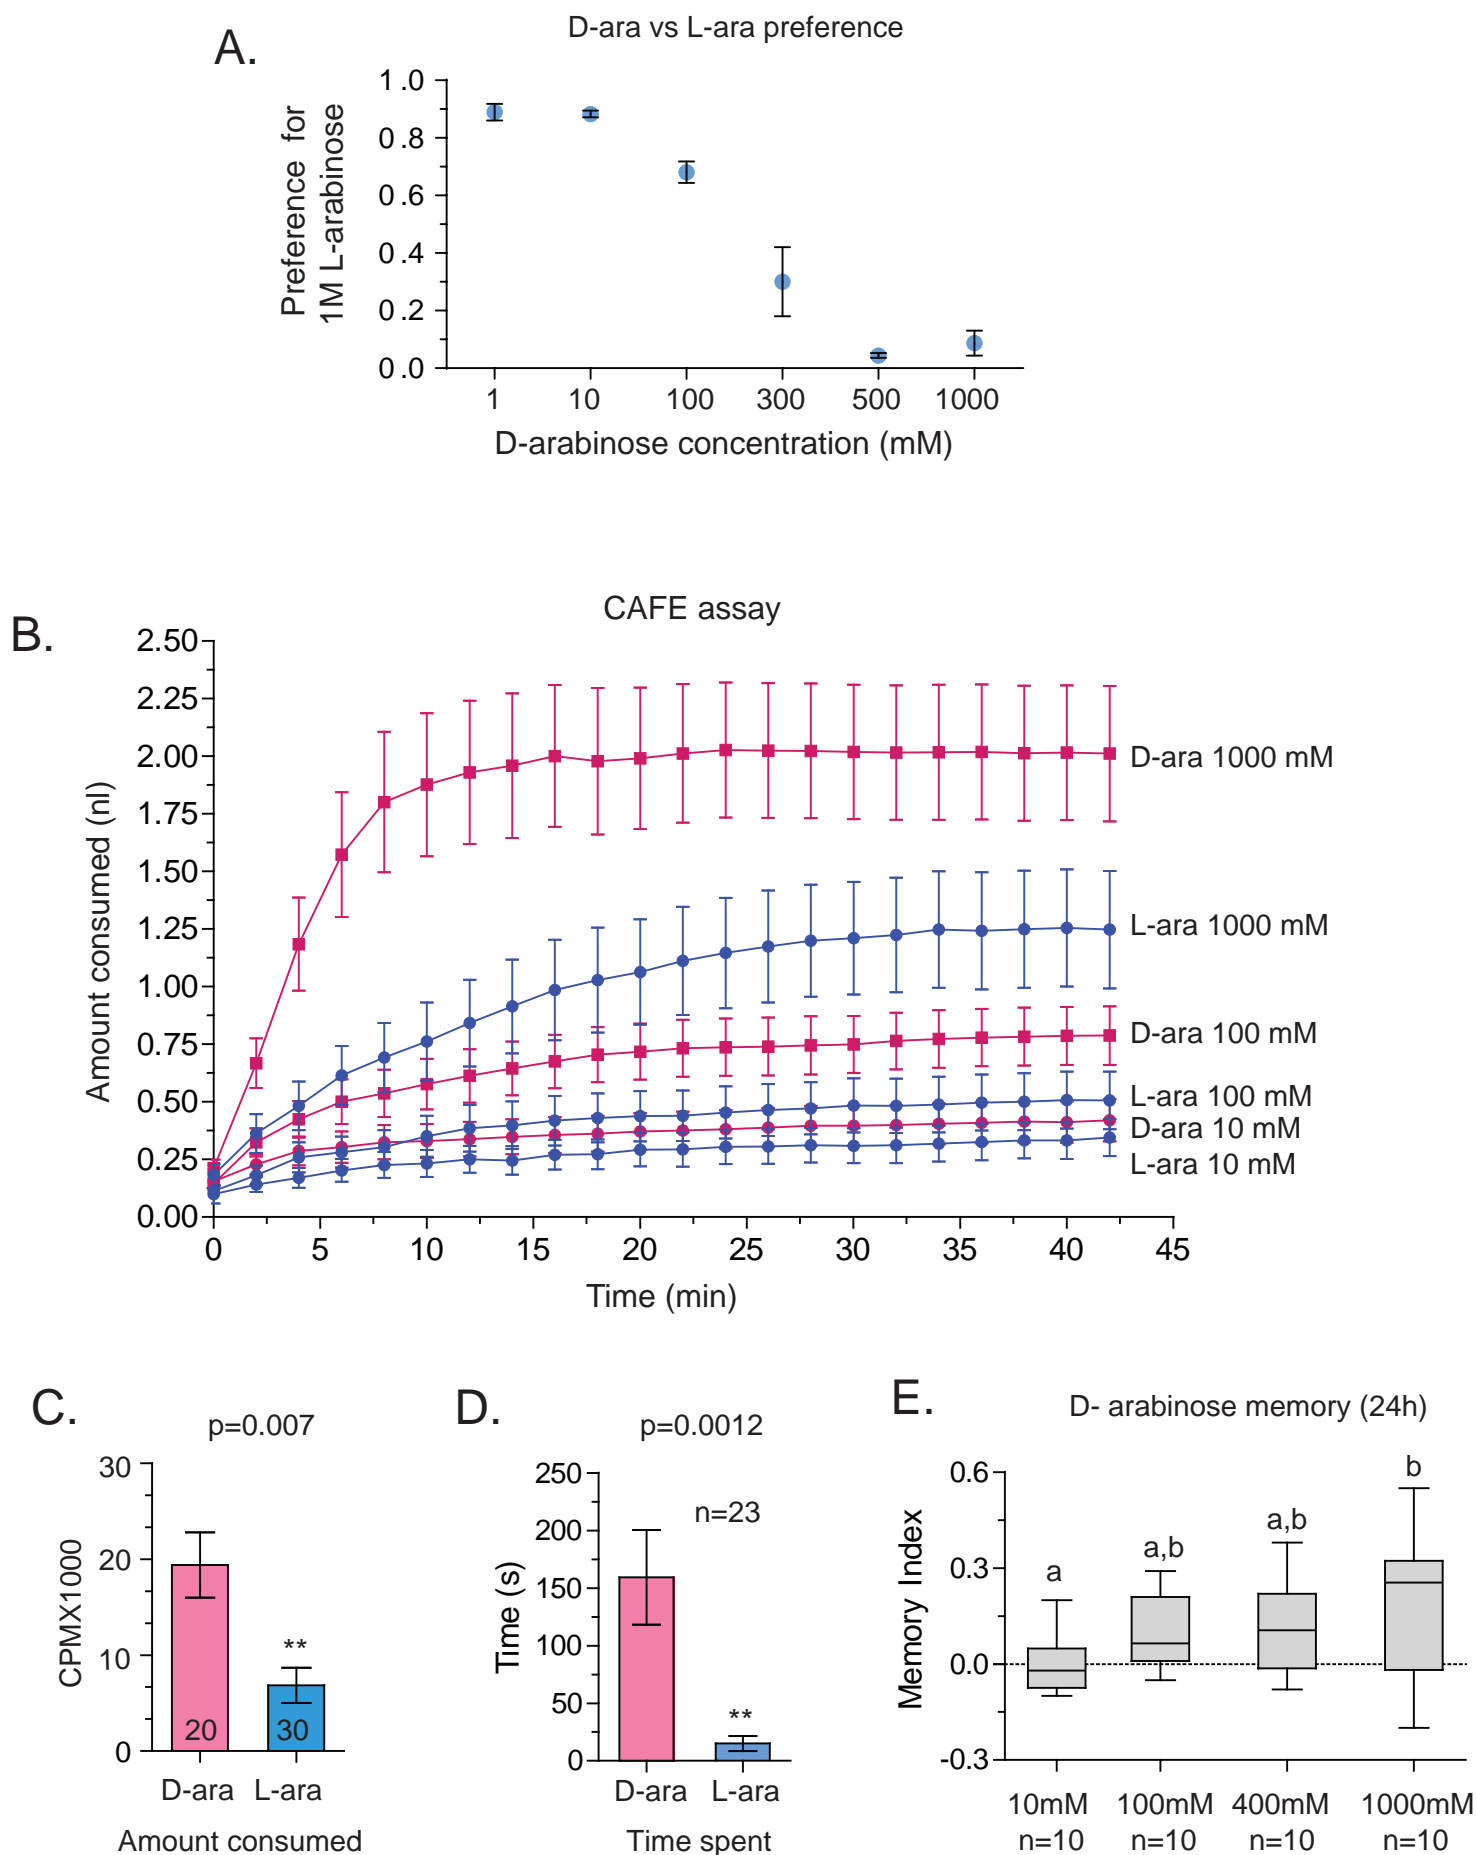

Figure 2- Figure supplement 3

Supplement: supp [file elife_poa_e22283_Figure_2_figure_Supplement_3.pdf › elife_poa_e22283_Figure_2_figure_Supplement_3.pdf]

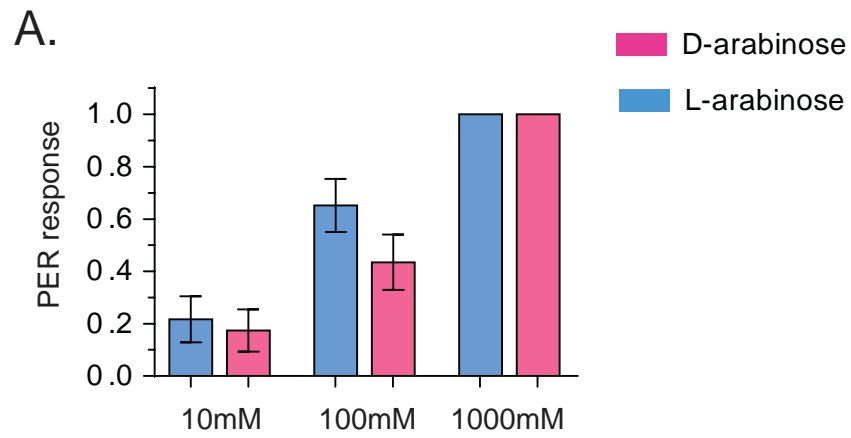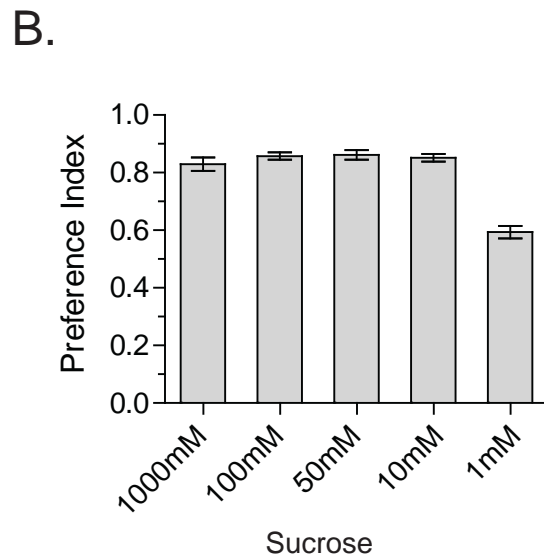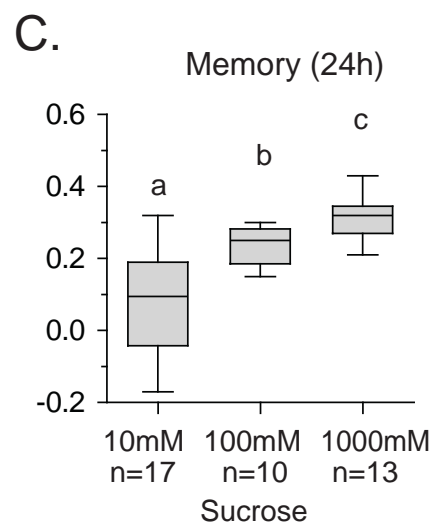

Figure 2- Figure supplement 4

Supplement: supp [file elife_poa_e22283_Figure_2_figure_Supplement_4.pdf › elife_poa_e22283_Figure_2_figure_Supplement_4.pdf]

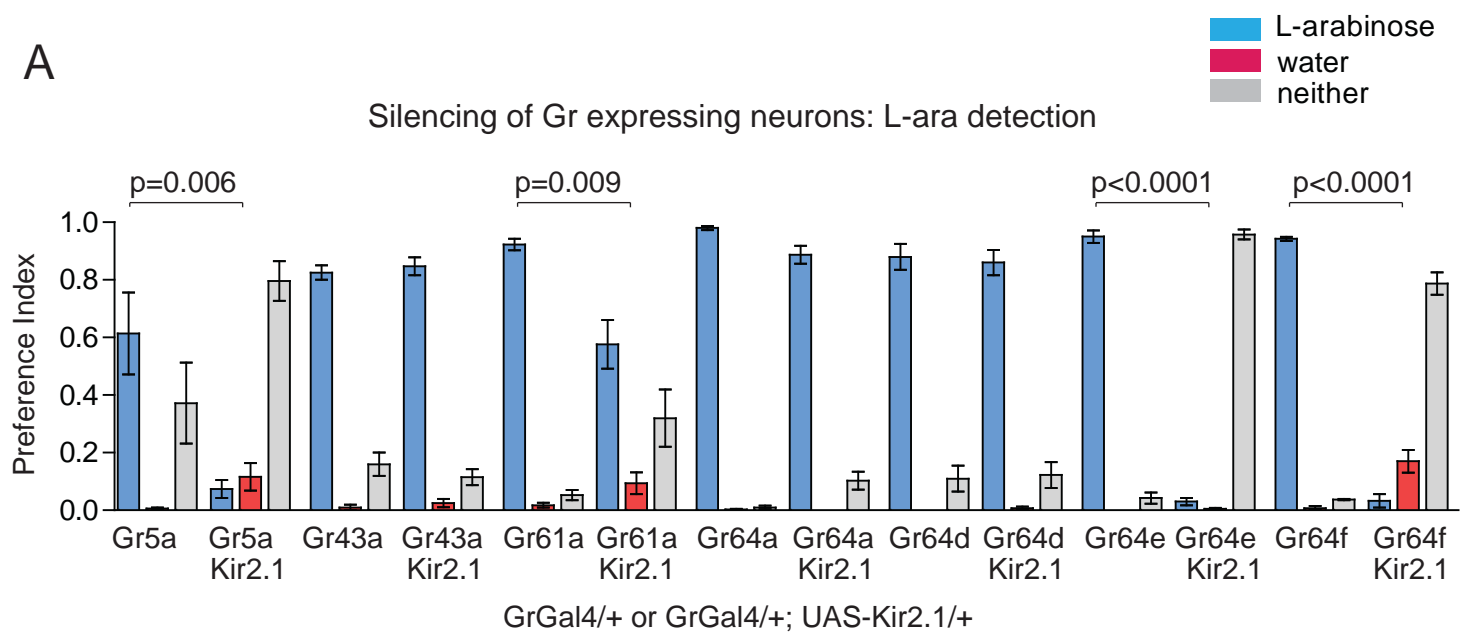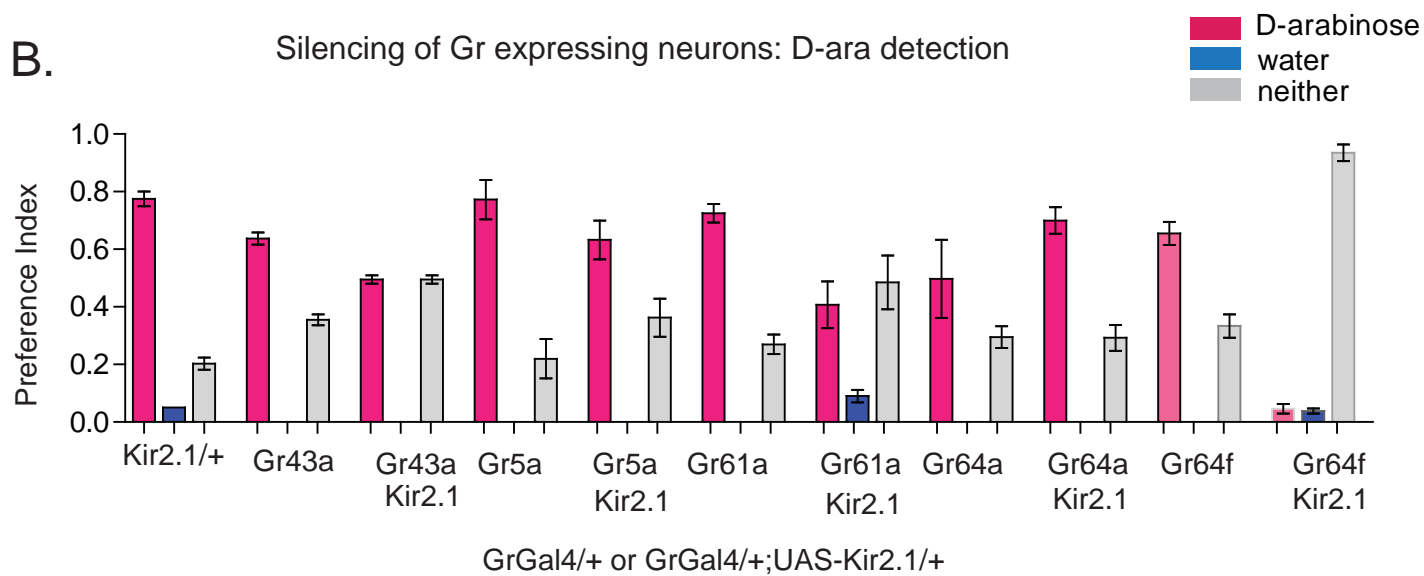

Figure3- Figure supplement 1

Supplement: supp [file elife_poa_e22283_Figure_3_figure_Supplement_1.pdf › elife_poa_e22283_Figure_3_figure_Supplement_1.pdf]

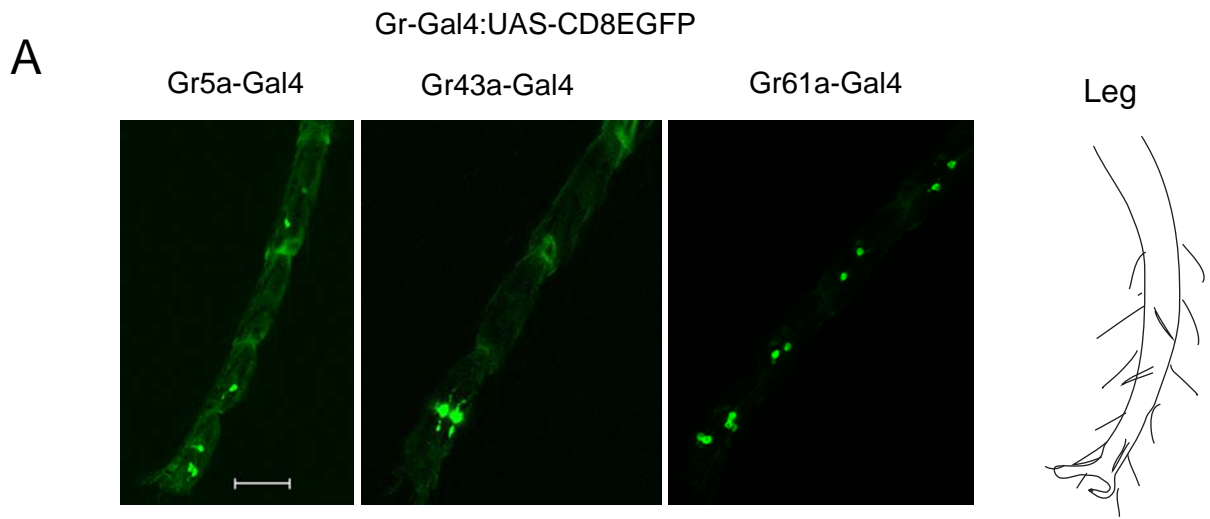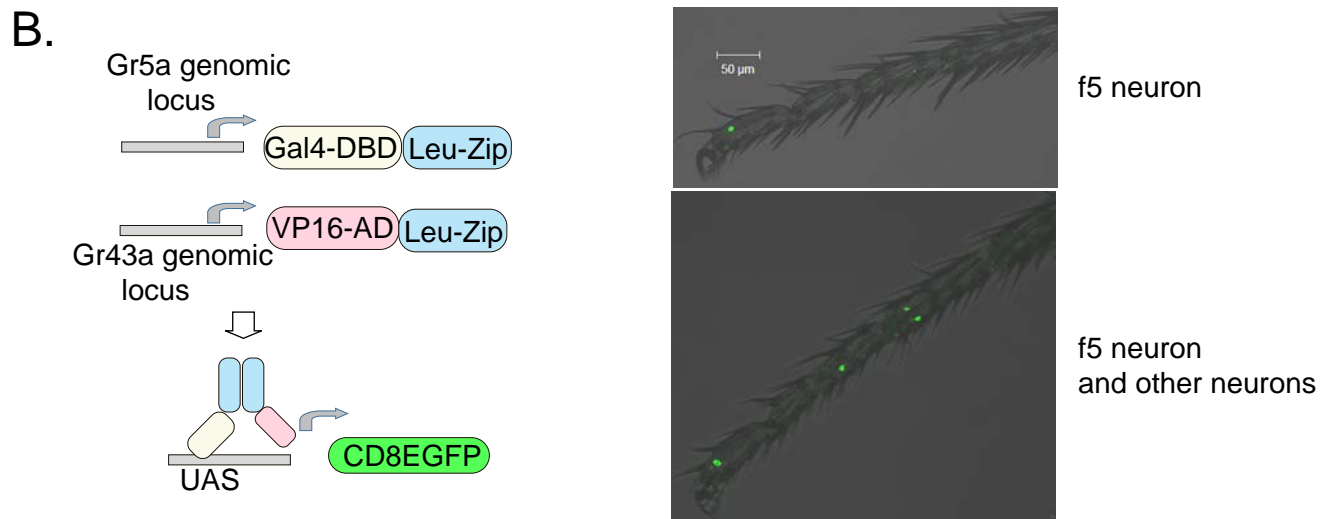

Figure 4-Figure supplement 1

Supplement: supp [file elife_poa_e22283_Figure_4_figure_Supplement_1.pdf › elife_poa_e22283_Figure_4_figure_Supplement_1.pdf]

A.

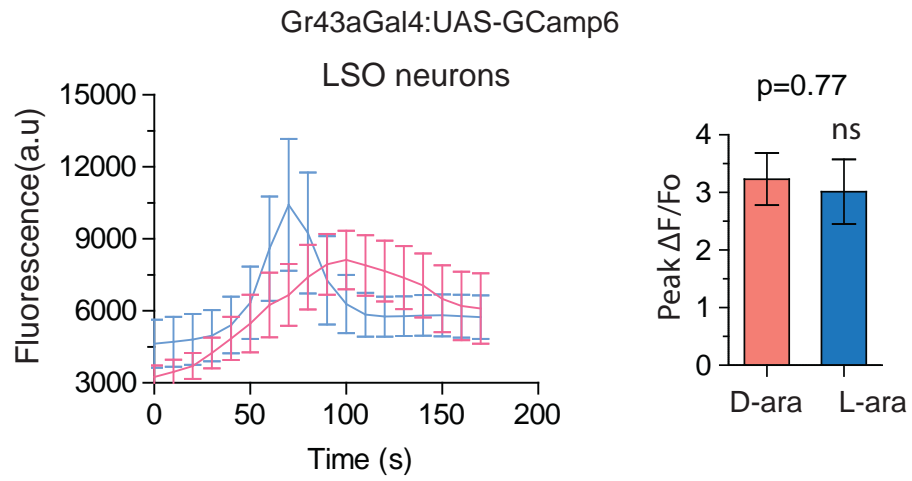

B.

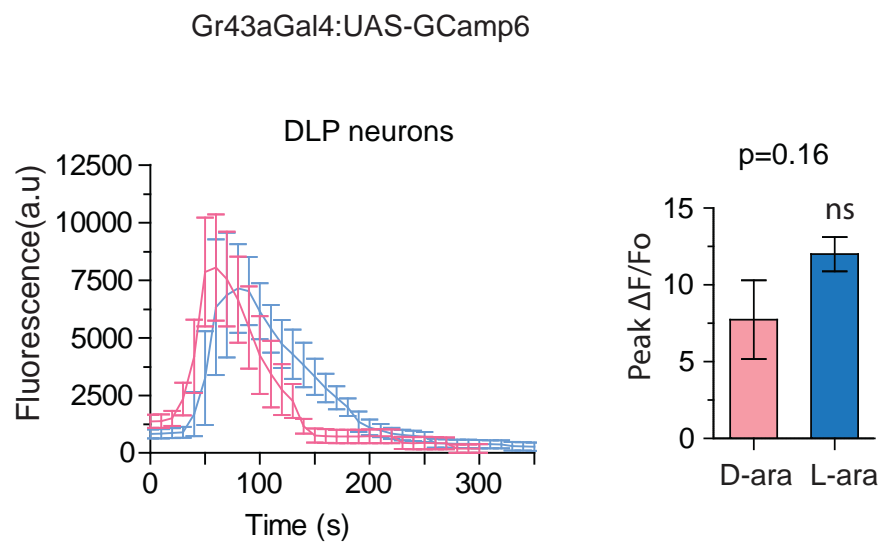

Figure 5-Figure supplement 1

Supplement: supp [file elife_poa_e22283_Figure_5_figure_Supplement_1.pdf › elife_poa_e22283_Figure_5_figure_Supplement_1.pdf]

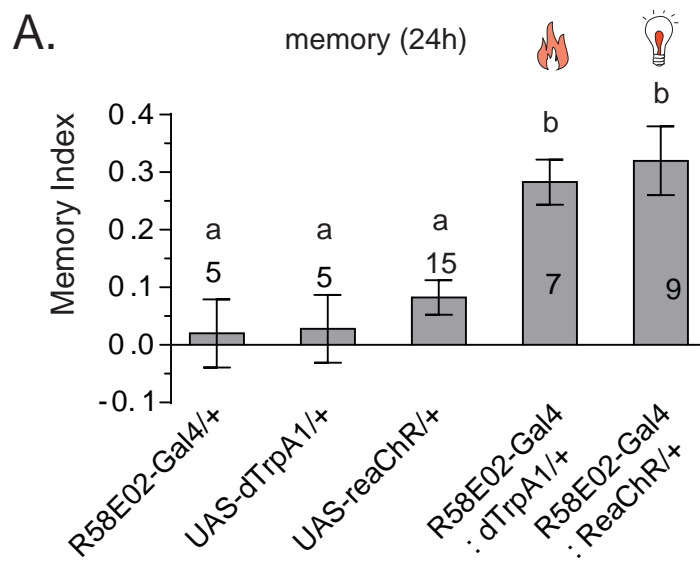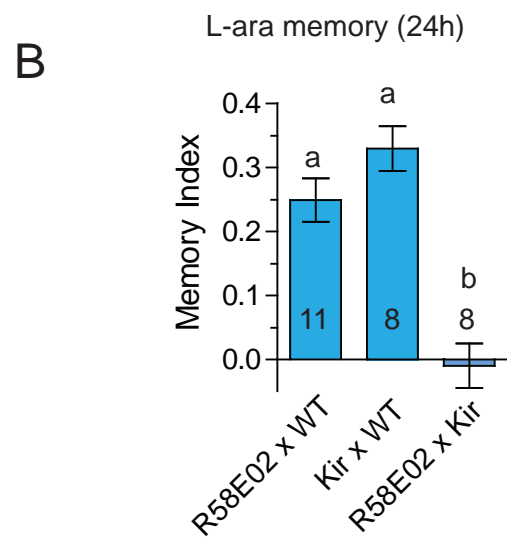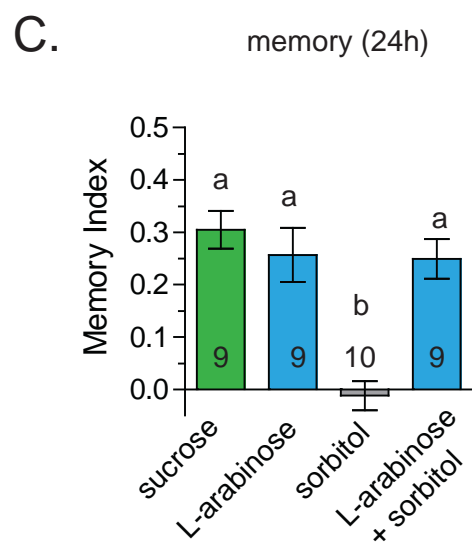

Figure 6-Figure supplement 1

Supplement: supp [file elife_poa_e22283_Figure_6_figure_Supplement_1.pdf › elife_poa_e22283_Figure_6_figure_Supplement_1.pdf]
